# Supplementary material for: State-aware detection of sensory stimuli in the cortex of the awake mouse
Source: PubMed Central journal article supplement (PMC6561583; doi:10.1371/journal.pcbi.1006716), 2019-05-31
Supplement: pcbi.1006716.s003.pdf [file pcbi.1006716.s003.pdf]

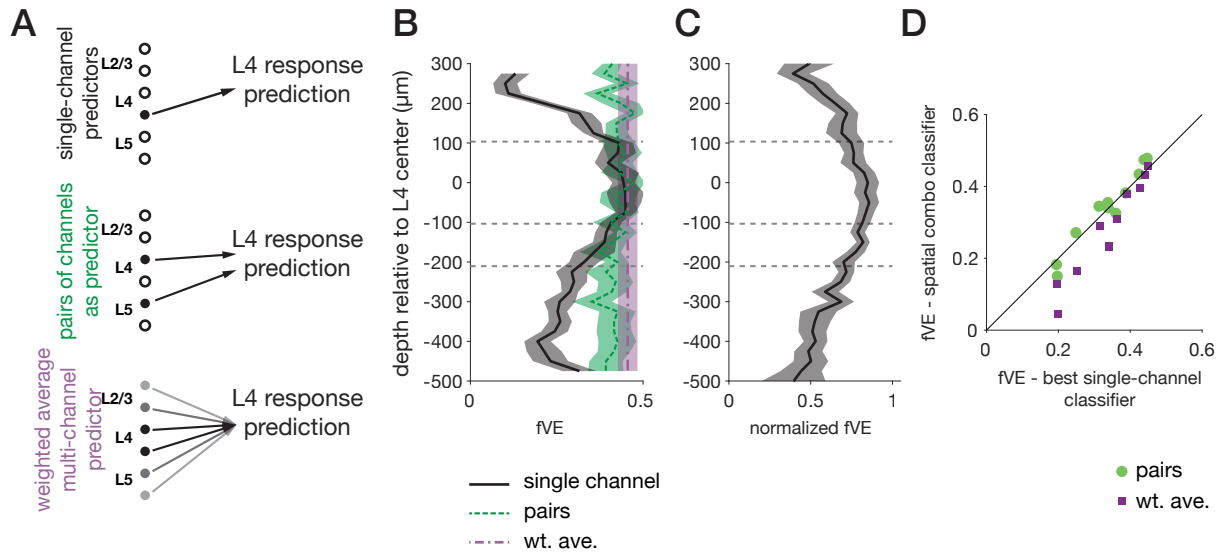

**Supplemental Figure 3 (associated with Figure 4). Comparison of performance of different classifiers and more complex input transformation to the single-channel predictor.**

**A-D:** Same as Fig. 4, but including a “multi-channel predictor,” constructed from the projection of pre-stimulus activity onto the top spatial modes in spontaneous LFP determined by PCA.
