# Supplementary material for: State-aware detection of sensory stimuli in the cortex of the awake mouse
Source: PubMed Central journal article supplement (PMC6561583; doi:10.1371/journal.pcbi.1006716), 2019-05-31
Supplement: pcbi.1006716.s005.pdf [file pcbi.1006716.s005.pdf]

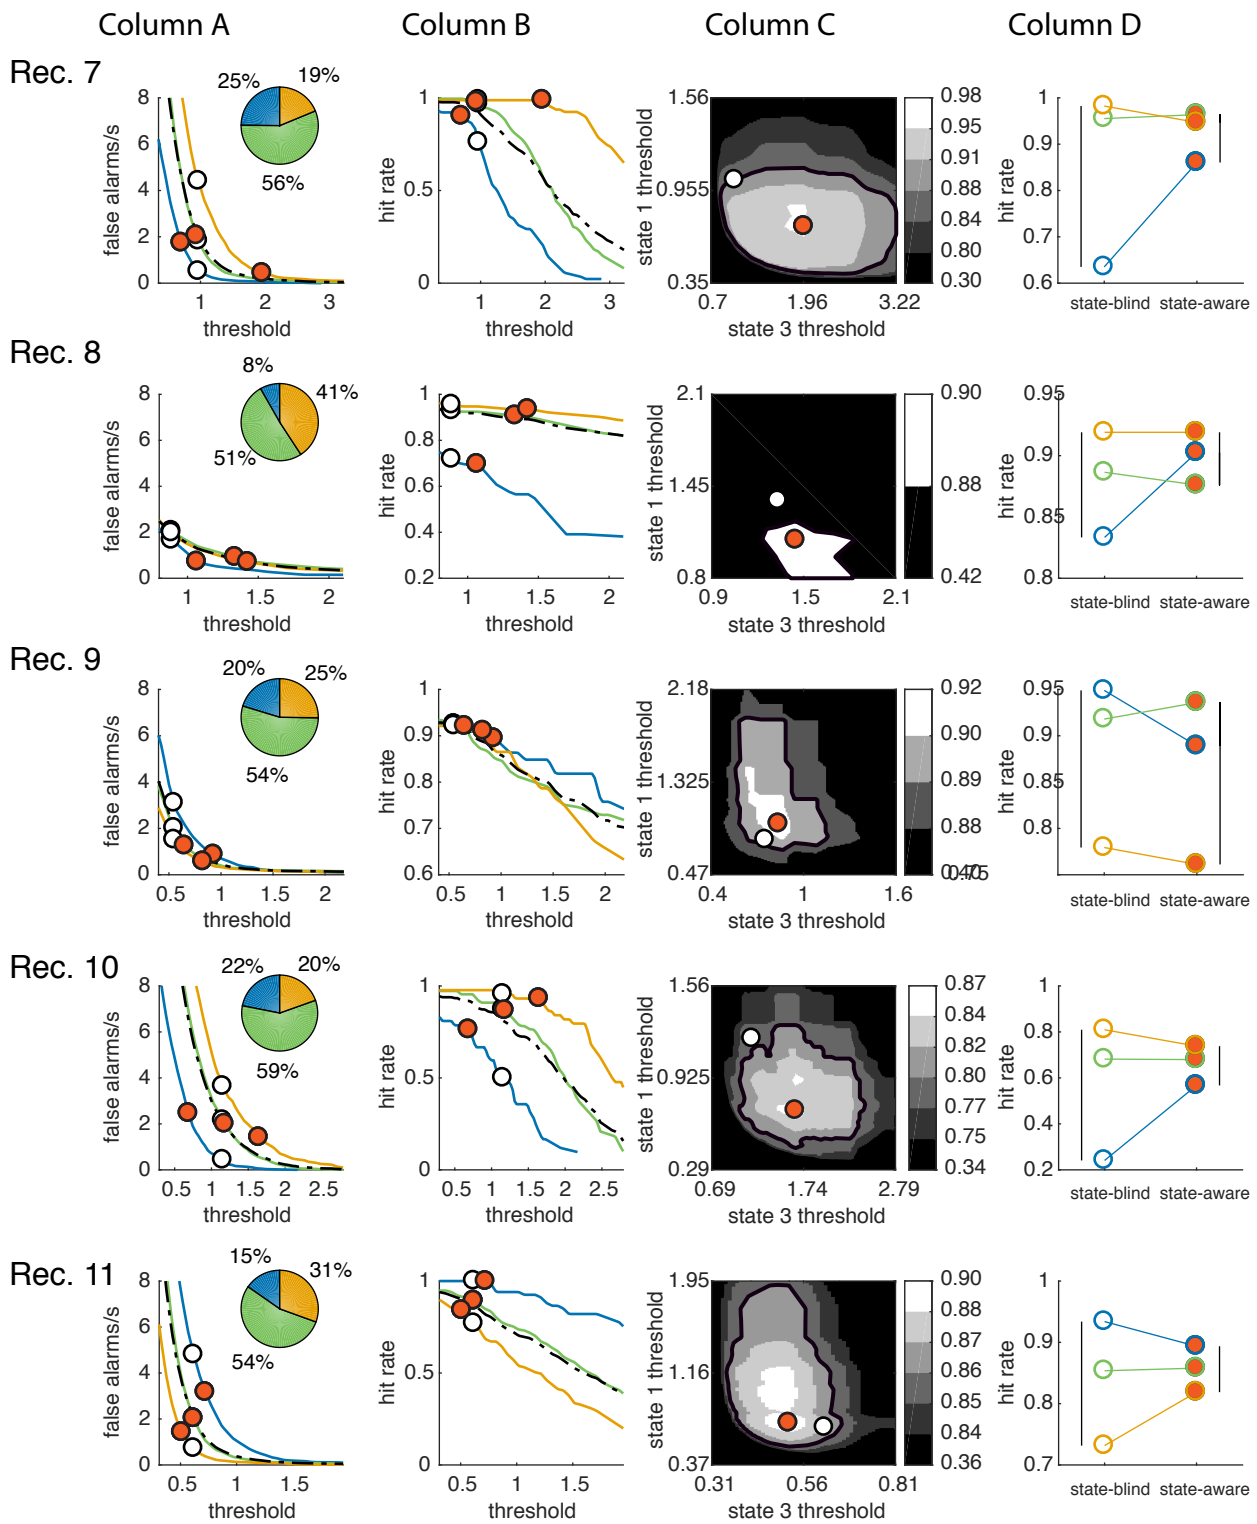

**Supplemental Figure 5 (associated with Figure 6):** Panels A-D of Figure 6 for recordings 7 through 11. See SFig 4 for caption. Recording 6 is shown in Figure 6.
